# Supplementary material for: Knockdown of TMEM14A expression by RNAi inhibits the proliferation and invasion of human ovarian cancer cells
Source: Oxford University Press journal article supplement (doi:10.1042/bsr20150258), 2016-02-01
Supplement: bsr036e298add.pdf [file bsr036e298add.pdf]

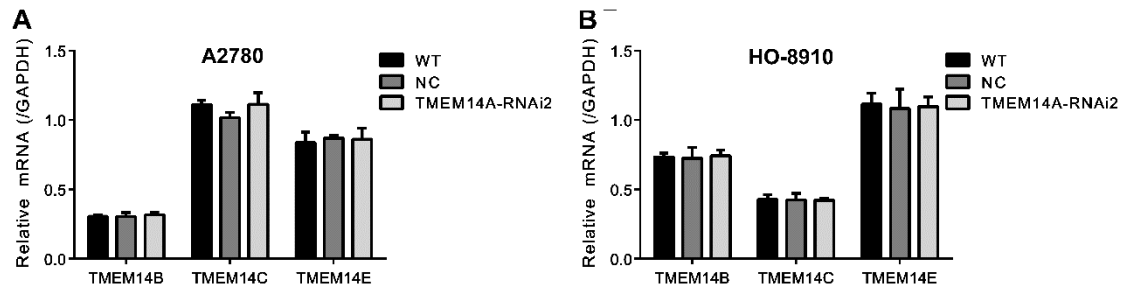

Figure S1. TMEM14A shRNA-2 had no effects on the mRNA expression of TMEM14B, TEMEM14C and TMEM14E in A2780 (A) and HO-8910 cells (B). GAPDH was used as an internal control. WT: wild type cells; NC: scrambled shRNA virus infected cells; TMEM14A-RNAi2: TMEM14-shRNA-2 virus infected cells. Primers were listed as follows: TMEM14B (NM\_001127711.2), 5'-GTTTGGCTTTGGCTACAC-3' and 5'-TCCAAGCTGGAACATGAC-3'; TMEM14C (NM\_001165258.1), 5'-GTCGCCAAAGTTGGAGTTAG-3' and 5'-TTACATACTCGCCACCTCTG-3'; TMEM14E (NR\_132656.1), 5'-GGCTTGGCTTTGTCTATG-3' and 5'-CCTTTGGATTCCGTGATG-3'.
